# Supplementary material for: PopTargs: a database for studying population evolutionary genetics of human microRNA target sites
Source: Oxford University Press journal article supplement (doi:10.1093/database/baz102), 2019-01-01
Supplement: supplemtary_table_1_baz102.pdf [file supplemtary_table_1_baz102.pdf]

**Supplementary Table 1.** Accession number of sRNA-seq experiments processed in this study.

| <b>Tissue</b> | <b>EBI-ENA accession number</b>                                                                                                                                                                                              |
|---------------|------------------------------------------------------------------------------------------------------------------------------------------------------------------------------------------------------------------------------|
| Blood         | DRX012360; DRX012361;<br>DRX012362; SRX318164;<br>SRX318180; SRX386679;<br>SRX386680; SRX386681;<br>SRX426123; SRX426124;<br>SRX426125; SRX426475;<br>SRX426478; SRX666575;<br>SRX666576; SRX666577;<br>SRX666578; SRX666579 |
| Brain         | SRX182778; SRX375448;<br>SRX375450; SRX375452;<br>SRX375455; SRX375461;<br>SRX375462; SRX375463;<br>SRX375464; SRX375466;<br>SRX375467                                                                                       |
| Breast        | SRX513283; SRX513284;<br>SRX513285; SRX513286                                                                                                                                                                                |
| Cerebellum    | SRX182779                                                                                                                                                                                                                    |
| Heart         | SRX182780                                                                                                                                                                                                                    |
| Kidney        | SRX182781                                                                                                                                                                                                                    |
| Liver         | SRX353113                                                                                                                                                                                                                    |
| Lung          | DRX003170; DRX003171                                                                                                                                                                                                         |
| Placenta      | SRX262196; SRX262197;<br>SRX262198; SRX262199;<br>SRX262200; SRX262201;<br>SRX262202; SRX262203                                                                                                                              |
| Testis        | SRX182782; SRX271415;<br>SRX271416; SRX271417                                                                                                                                                                                |
